# Supplementary material for: Selection, Characterization and Interaction Studies of a DNA Aptamer for the Detection of Bifidobacterium bifidum
Source: PubMed Central journal article supplement (PMC5454810; doi:10.3390/ijms18050883), 2017-04-25
Supplement: ijms-18-00883-s001.pdf [file ijms-18-00883-s001.pdf]

# Selection, Characterization and Interaction Studies of a DNA Aptamer for the Detection of *Bifidobacterium bifidum*

Lujun Hu, Linlin Wang, Wenwei Lu, Jianxin Zhao, Hao Zhang and Wei Chen

Table S1. Random sequence of seven families of 30 sequences <sup>a</sup>.

| Family | Name       | Sequence (5'→3')                          |
|--------|------------|-------------------------------------------|
| I      | CCFM641-2  | GCCTGGCCAGGTGCCCCGATATAGCGACGCCTTGCCCCGGC |
|        | CCFM641-11 | GCCTGGCCAGGTGCCCCGATATAGCGACGCCTTGCCCCGGC |
|        | CCFM641-23 | GCCTGGCCAGGTGCCCCGATATAGCGACGCCTTGCCCCGGC |
|        | CCFM641-14 | GCCTGGCCAGGTGCGCCGATATAGCCTGCCCTTGCCCCGGC |
|        | CCFM641-18 | GCCTGGCCACGTGCGCGGATATAGCCTGCCCTTGCCCCGGC |
| II     | CCFM641-4  | GCCCCGGACGGCGGGAAGCCTCGTACCCCCCGTGAGCGGC  |
|        | CCFM641-9  | GCCCCGGACGGCGGGAAGCCTCGTACCCCCCGTGAGCGGC  |
|        | CCFM641-25 | GCCCCGGACGGCGGGAAGCCTCGTACCCCCCGTGAGCGGC  |
|        | CCFM641-28 | GCCCCGGACGGCGGGAAGCCTCGTACCCCCCGTGAGCGGC  |
|        | CCFM641-7  | GCCCCGGACGGCGGGAAGCCTCGTACCCCCGGTGAGCGGC  |
| III    | CCFM641-5  | TGCGTGAGCGGTAGCCCCGTACGACCCACTGTGGTTGGGC  |
|        | CCFM641-6  | TGCGTGAGCGGTAGCCCCGTACGACCCACTGTGGTTGGGC  |
|        | CCFM641-17 | TGCGTGAGCGGTAGCCCCGTACGACCCACTGTGGTTGGGC  |
|        | CCFM641-21 | TGCGTGAGCGGTAGCCCCGTACGACCCACTGTGGTTGGGC  |
|        | CCFM641-26 | TGCGTGAGCGGTAGCCCCGTACGACCCACTGTGGTTGGGC  |
|        | CCFM641-27 | TGCGTGAGCGGTAGCCCCGTACGACCCACTGTGGTTGGGC  |
|        | CCFM641-30 | TGCGTGAGCGGTAGCCCCGTACGACCCACTGTGGTTGGGC  |
|        | CCFM641-29 | TGCGTGAGCGGTAGCCCCGTACGACCCACTGTGGTTGGGC  |
| IV     | CCFM641-3  | TGCGTGAGCGGTAGCCGGGTACGACCCACTGTGGTTGGGC  |
|        | CCFM641-12 | GTCACACCGGCCGTCTCCGGTGTGGGACGCCCCGTGTGGC  |
|        | CCFM641-13 | GTCACACCGGCCGTCTCCGGTGTGGGACGCCCCGTGTGGC  |
|        | CCFM641-16 | GTCACACCGGCCGTCTCCGGTGTGGGACGCCCCGTGTGGC  |
|        | CCFM641-22 | GTCACACCGGCCGTCTCCGGTGTGGGACGCCCCGTGTGGC  |
|        | CCFM641-24 | GTCACACCGGCCGTCTCCGGTGTGGGACGCCCCGTGTGGC  |
|        | CCFM641-19 | GTCACACCGGCCGTCTGCGGTGTGGGACGCCCCGTGTGGC  |
| V      | CCFM641-20 | GTCACACCGGCCGTCTCCGGTCTGGCAGCCGGCTGTGGC   |
|        | CCFM641-8  | GCCCGCGCCCCCTTCTGCCGTTGGTCGGAACCCCTGTGCGC |
| VI     | CCFM641-10 | GCCCGCGCGGGTTCTGCCGTTGGTGGGAACCCCTGTGCGC  |
|        | CCFM641-1  | CGCCCTACACCACTCTCCGAGCGCTGTACGGCATCCCTGG  |
| VII    | CCFM641-15 | GCCCGCACACACAGATGTCCATGTGTGCGCTGCCGGC     |

<sup>a</sup> The primer sequences are AGCAGCACAGAGGTCAGATG at the 5' end and CCTATGCGTGCTACCGTGAA at the 3' end.

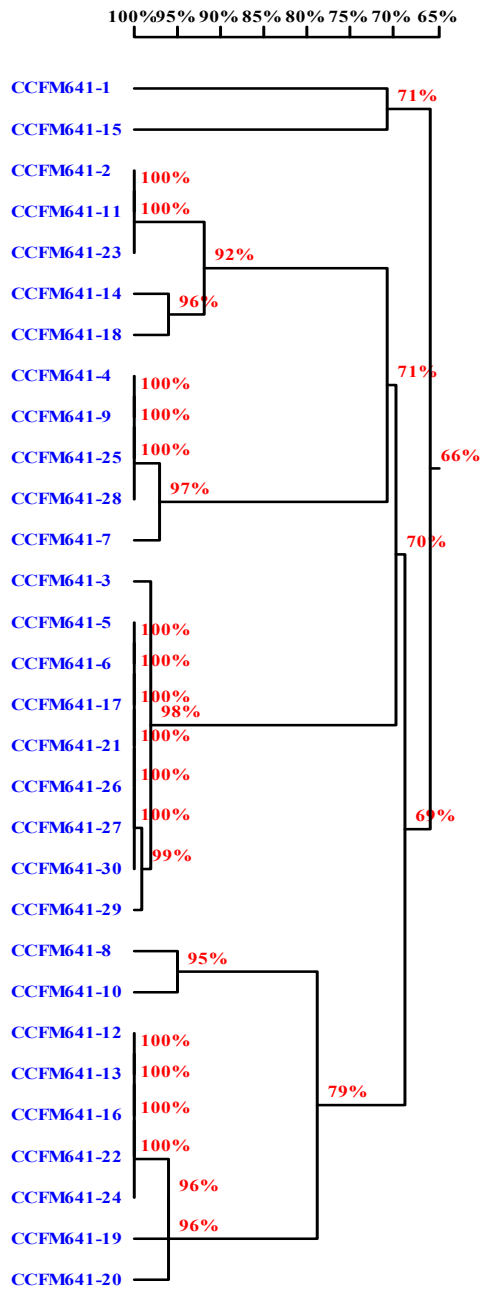

**Figure S1.** Homology tree of aptamer sequences. The sequence alignment was performed using the DNAMAN software package (Lynnon Biosoft Company, USA).

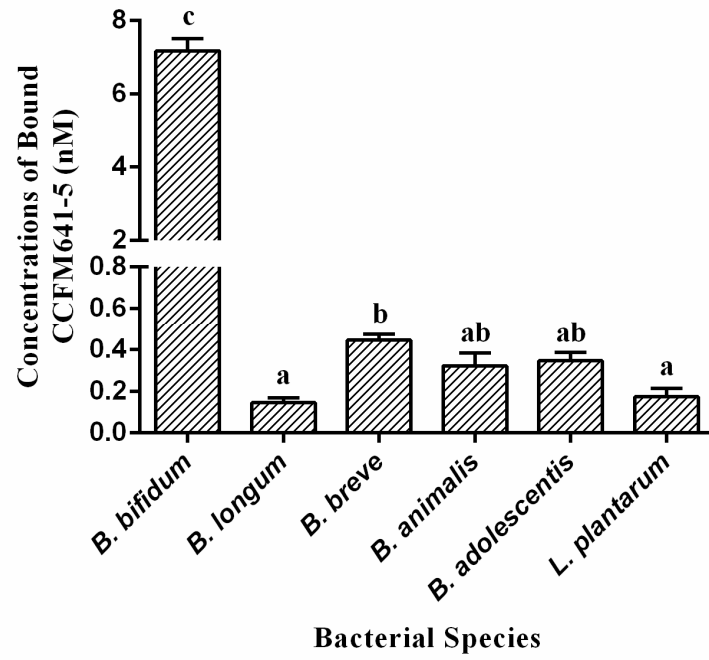

**Figure S2.** The binding abilities of aptamer CCFM641-5 to different bacterial species. Bound aptamer concentrations were quantified by qPCR. The concentrations of bound aptamer CCFM641-5 represent the mean  $\pm$  SD of three independent experiments. Bars with different letters are significantly different ( $p < 0.05$ ).
